# Supplementary material
Source: Elsevier journal article supplement (https://www.sciencedirect.com/science/article/pii/S0213911119302584)
Supplement: mmc1 [file S0213911119302584:mmc1.docx]

## Apéndice

## Descripción de contenido

1. Diario de publicación.
2. Título del texto.
3. Fecha de publicación.
4. Enfoque del texto según la presentación del problema:

- Individual: todas aquellas publicaciones que enfoquen las causas de la obesidad responsabilizando al sujeto, poniendo el énfasis en los hábitos alimentarios y/o estilo de vida sedentario de la persona sin hacer referencia a los determinantes sociopolíticos subyacentes (p. ej., el bajo nivel socioeconómico favorece un mayor consumo de comida hipercalórica debido a su bajo precio) u otros (p. ej., publicidad engañosa y estrategias de *marketing* agresivas). También incluimos en este apartado aquellos artículos sobre medidas de intervención basadas en la acción individual para afrontar el problema, como pueda ser el cambio de hábitos (realizar ejercicio físico, comer «sano») o la educación en salud (promoción de estilos de vida saludables: educación en nutrición y actividad física).
- Colectivo: causas de la obesidad desde el punto de vista comunitario, teniendo en cuenta los factores socioeconómicos, políticos y el papel de la propia industria alimentaria como determinantes de la obesidad. Del mismo modo, incluimos aquellas publicaciones sobre medidas de intervención político-sanitarias destinadas a la toma de decisiones con objetivo regulador de los determinantes de obesidad (p. ej., impuestos a las bebidas azucaradas, regulación de la publicidad, etc.).
- Ambos enfoques:

1. Acentuación en lo individual: cumple las características anteriormente citadas del enfoque individual y cumple alguno de los siguientes criterios:
   - Solo mención de políticas de acción de carácter colectivo sin mencionar explícitamente el sujeto y/o la identidad responsable de llevarlas a cabo.
   - Propuestas explícitas de políticas de carácter colectivo (mención del sujeto ejecutor).
   - Mención del sujeto ejecutor sin concretar medidas de actuación.
   - Mención del estilo de vida (dieta y/o actividad física) como causa de obesidad sin tener en cuenta los determinantes sociales, económicos y políticos subyacentes.
2. Acentuación en lo colectivo:cumple las características anteriormente citadas del enfoque colectivo, mencionando algunos de los determinantes individuales de obesidad o medidas de prevención centradas en el individuo.
3. Indeterminado.
4. Medidas propuestas para combatir la obesidad:

- Políticas públicas de salud o de otro ámbito dirigidas a la prevención de la obesidad o intervenciones de las Administraciones Públicas en el mismo sentido (entendidas como iniciativas gubernamentales o estrategias políticas contra la obesidad llevadas a cabo por el gobierno o una institución pública a nivel local, regional, nacional o internacional), que pueden ser:

1. 1. Medidas reguladoras legislativas que favorezcan un entorno saludable en el que las elecciones saludables sean las más fáciles: tasas a productos no saludables, prohibición de la publicidad para menores, etc.

2. Modificaciones del entorno mediante políticas sanitarias y no sanitarias: disponibilidad de espacios para la actividad física, planes de movilidad, etc.

1. Campañas o iniciativas para mejorar los hábitos alimentarios y actividad física dirigidas a los individuos: iniciativas para informar al público a fin de que adopte conductas saludables.

- Acciones dirigidas a los individuos para estimular que acudan a los servicios sanitarios: consejos preventivos, pautas dietéticas, tratamiento (cirugía bariátrica).
- Campañas o iniciativas llevadas a cabo por entidades privadas:

1. Centradas en el individuo con el objetivo de modificar los estilos de vida individuales, promocionando y educando en salud.
2. Centradas en el entorno: disminución de los estímulos obesogénicos (limitar el acceso a la comida hipercalórica, política de movilidad de las empresas…).
3. Medidas autorreguladoras de la industria o actuaciones de prevención de la obesidad llevadas a cabo por las industrias o en alianza con otras organizaciones.

- Medidas médico-quirúrgicas: cirugía bariátrica o tratamiento farmacológico.
- Recomendaciones o consejos individuales para prevenir o controlar la obesidad.

1. Causas:
   - Hábitos de vida: mala alimentación, entendida como un exceso de consumo de productos hipercalóricos ricos en grasas y azúcares, y sedentarismo.
   - Falta de tiempo (estrés, poco tiempo para comer o cocinar).
   - Estrategias de *marketing* de la industria alimentaria.
   - Ambientales: entorno obesogénico, globalización, bajo nivel socioeconómico.
   - Hábitos de vida u obesidad de los progenitores.
   - Componente genético.
   - Otras: falta de información de los progenitores, falta de actualización de personal pediátrico o nutricionistas.
   - No se especifican.
2. Influencia de la industria alimentaria en la generación del documento o apariencia de publirreportaje:mención de aquellas noticias en las que hay elevados indicios de promoción por parte de la industria alimentaria.
